# Supplementary material
Source: Research Square preprint supplement (doi:10.21203/rs.3.rs-9172096/v1)
Supplement: Supplementary file 1 [file b7ed99cc89eac834a375ce5a.docx]

**Sensitivity of effects estimated to a confounding factor (Rosenbaum sensitivity test)**

**Table 1** presents the results of the Rosenbaum sensitivity test, after estimating the causal effect on yield. In addition to a good correction of imbalances between observed covariates, Rosenbaum's sensitivity test indicates robustness against potential unobserved bias. For example, we lose significance at 5% (or 10%) with a 5% (or 16%) deviation from randomisation induced by a confounding factor. This level of sensitivity is acceptable. It would be concerning if the significance of the sensitivity test were lost at 3%.

**Table 1**: Sensitivity of yield to confusion bias

| Gamma | sig+ | sig- | t-hat+ | t-hat- | CI+ | CI- |
| --- | --- | --- | --- | --- | --- | --- |
| 1.00 | 0.031428 | 0.031428 | 110.337 | 110.337 | -6.67998 | 228.465 |
| 1.01 | 0.034454 | 0.028621 | 108.255 | 113.065 | -9.40501 | 230.420 |
| 1.02 | 0.037679 | 0.026049 | 105.235 | 115.340 | -11.565 | 233.810 |
| 1.03 | 0.041107 | 0.023692 | 103.645 | 118.020 | -15.190 | 235.705 |
| 1.04 | 0.044743 | 0.021535 | 99.805 | 120.730 | -17.035 | 237.475 |
| 1.05 | 0.048592 | 0.019562 | 98.525 | 122.055 | -18.830 | 239.620 |
| 1.06 | 0.052656 | 0.017760 | 96.295 | 124.135 | -22.135 | 241.845 |
| 1.07 | 0.056940 | 0.016114 | 95.030 | 126.630 | -23.745 | 243.145 |
| 1.08 | 0.061446 | 0.014612 | 92.410 | 129.375 | -26.200 | 244.855 |
| 1.09 | 0.066176 | 0.013243 | 89.780 | 131.450 | -28.000 | 247.890 |
| 1.10 | 0.071132 | 0.011996 | 88.765 | 132.990 | -30.765 | 250.420 |
| 1.11 | 0.076316 | 0.010861 | 86.040 | 135.040 | -34.225 | 252.420 |
| 1.12 | 0.081727 | 0.009828 | 83.965 | 137.130 | -36.950 | 253.880 |
| 1.13 | 0.087366 | 0.008889 | 81.760 | 140.565 | -40.435 | 256.820 |
| 1.14 | 0.093232 | 0.008035 | 79.100 | 141.480 | -41.6549 | 259.370 |
| 1.15 | 0.099326 | 0.007260 | 78.075 | 144.585 | -43.165 | 262.315 |
| 1.16 | 0.105645 | 0.006557 | 75.955 | 146.470 | -44.615 | 264.725 |
| 1.17 | 0.112187 | 0.005919 | 73.510 | 148.425 | -45.495 | 267.600 |

The sensitivity analysis to an unobservable confounding bias reveals that the results obtained on agricultural income are relatively robust, both at the 5% and 10% thresholds (**Table 2**). A deviation from randomisation, on the order of 14% to 26%, would be necessary to invalidate the significance of the results. These conclusions reinforce the reliability of the estimated effects on agricultural income.

**Table 2**: Sensitivity of income to confounding bias

| Gamma | sig+ | sig- | t-hat+ | t-hat- | CI+ | CI- |
| --- | --- | --- | --- | --- | --- | --- |
| 1 | 0.013196 | 0.013196 | 124828 | 124828 | 16736.6 | 233067 |
| 1.01 | 0.014658 | 0.01186 | 121297 | 127792 | 14372.9 | 236287 |
| 1.02 | 0.016239 | 0.010653 | 118603 | 129553 | 11435.9 | 238779 |
| 1.03 | 0.017944 | 0.009563 | 116493 | 132819 | 9795.29 | 240703 |
| 1.04 | 0.019778 | 0.00858 | 114447 | 134485 | 7357.97 | 243184 |
| 1.05 | 0.021747 | 0.007693 | 112623 | 138742 | 5048.97 | 247463 |
| 1.06 | 0.023855 | 0.006895 | 110649 | 140893 | 1149.91 | 249675 |
| 1.07 | 0.026107 | 0.006176 | 109763 | 142386 | -1287.08 | 251050 |
| 1.08 | 0.028508 | 0.005529 | 106210 | 144240 | -3411.36 | 254215 |
| 1.09 | 0.031063 | 0.004947 | 104683 | 145628 | -4578.92 | 256156 |
| 1.1 | 0.033776 | 0.004425 | 103621 | 148858 | -7622.59 | 260902 |
| 1.11 | 0.03665 | 0.003955 | 101068 | 150732 | -9039.41 | 262494 |
| 1.12 | 0.03969 | 0.003534 | 99434.6 | 153813 | -10403 | 264075 |
| 1.13 | 0.042899 | 0.003156 | 97363.6 | 155268 | -13487 | 265835 |
| 1.14 | 0.046279 | 0.002818 | 95154.7 | 157373 | -15864.1 | 267867 |
| 1.15 | 0.049836 | 0.002515 | 92384.2 | 159808 | -17827.5 | 269916 |
| 1.16 | 0.053569 | 0.002243 | 90541.3 | 161201 | -20067.4 | 272456 |
| 1.17 | 0.057483 | 0.002 | 89900.6 | 163276 | -22547.1 | 276201 |
| 1.18 | 0.061578 | 0.001782 | 87165.9 | 165091 | -24955.5 | 277920 |
| 1.19 | 0.065857 | 0.001588 | 84618.1 | 166131 | -28508.2 | 279584 |
| 1.2 | 0.070321 | 0.001414 | 82544.8 | 168197 | -31094.1 | 281654 |
| 1.21 | 0.07497 | 0.001259 | 80646.6 | 170439 | -32416.5 | 282278 |
| 1.22 | 0.079805 | 0.00112 | 78941.2 | 171569 | -33766.9 | 283397 |
| 1.23 | 0.084827 | 0.000997 | 77366.6 | 173086 | -34601.5 | 286177 |
| 1.24 | 0.090035 | 0.000886 | 75593.8 | 174517 | -37403.6 | 290051 |
| 1.25 | 0.095428 | 0.000788 | 72909 | 175722 | -39083.9 | 293837 |
| 1.26 | 0.101006 | 0.0007 | 71306.2 | 176640 | -40453.5 | 295701 |
| 1.27 | 0.106767 | 0.000622 | 68769.5 | 178249 | -44066.5 | 297057 |
